# Supplementary material for: Defects in the calcium-binding region drastically affect the cadherin-like domains of RET tyrosine kinase
Source: Royal Society of Chemistry journal article supplement (doi:10.1039/c6cp00042h), 2016-01-01
Supplement: c6cp00042h1.pdf [file c6cp00042h1.pdf]

## Defects in the calcium-binding region drastically affect the cadherin-like domains of RET tyrosine kinase

Chunxia Gao, Morten Grøtli, Leif A. Eriksson\*

*Department of Chemistry and Molecular Biology, University of Gothenburg, 405 30  
Göteborg, Sweden*

### SUPPLEMENTARY MATERIAL

**Figure 1.** The binding site for GFL-GFR $\alpha$  ligand interaction.

**Figure 2.** The final structure of RET CLD1-4 for the different systems after 300 ns MD simulations.

**Figure 3,** Evolution of secondary structure elements for the mutated/modified systems during 300 ns MD simulations.

**Figure 4,** The most populated structures of the calcium-binding site from cluster analysis for all five systems. The mutated residues in R231H, D264K and D300K mutants are colored in pink.

**Table 1.** Distances between the different pharmacophore features.

**Table 2.** Angles between the different pharmacophore features

\*email: leif.eriksson@chem.gu.se

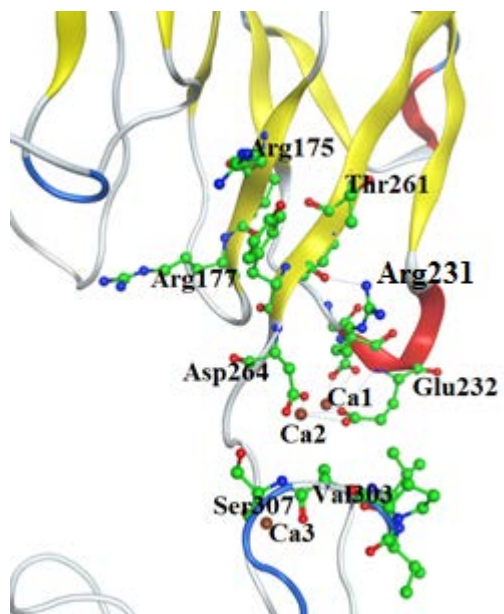

**Supplementary Figure 1.** The binding site for GFL-GFR $\alpha$  ligand interaction.

wildtype

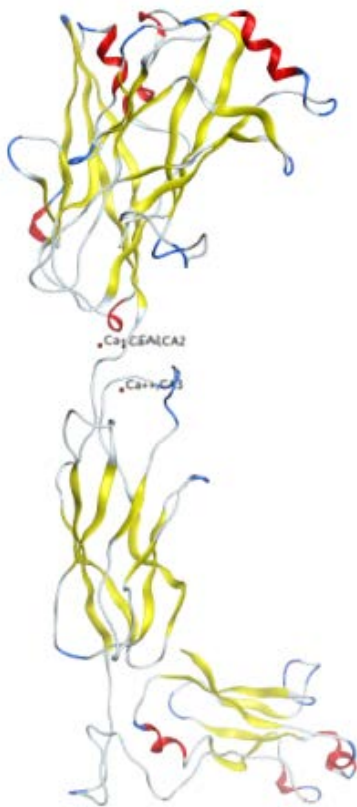

Calcium depleted

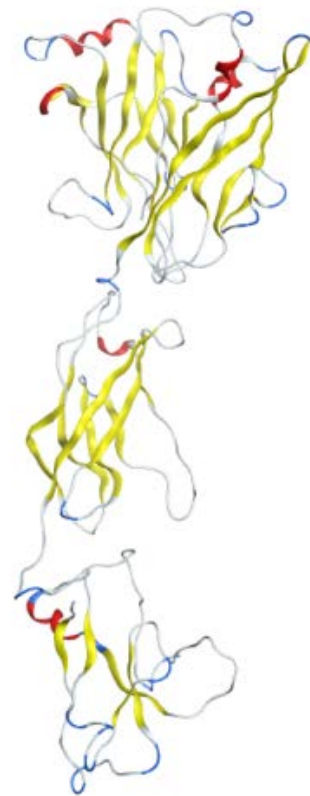

R231H

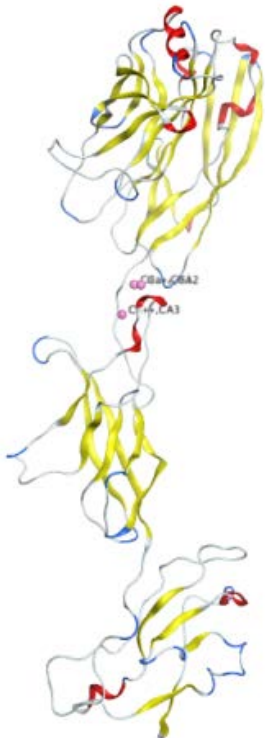

D264K

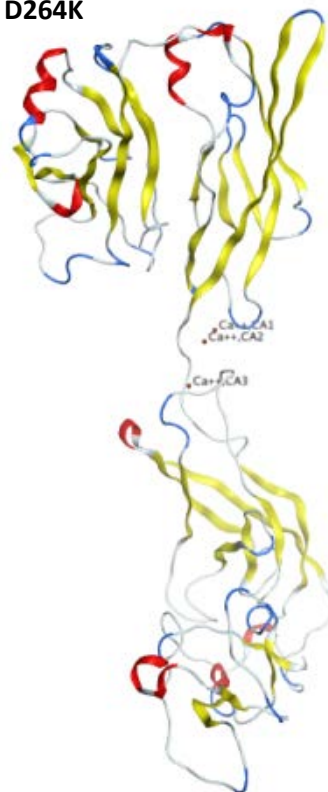

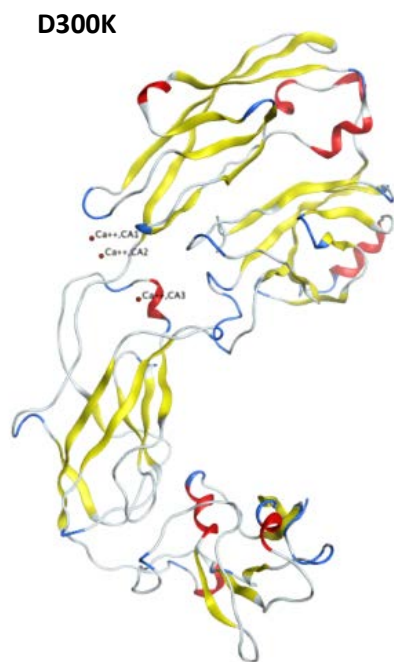

**Supplementary Figure 2.** The final structure of RET CLD1-4 for the different systems after 300 ns MD simulations.

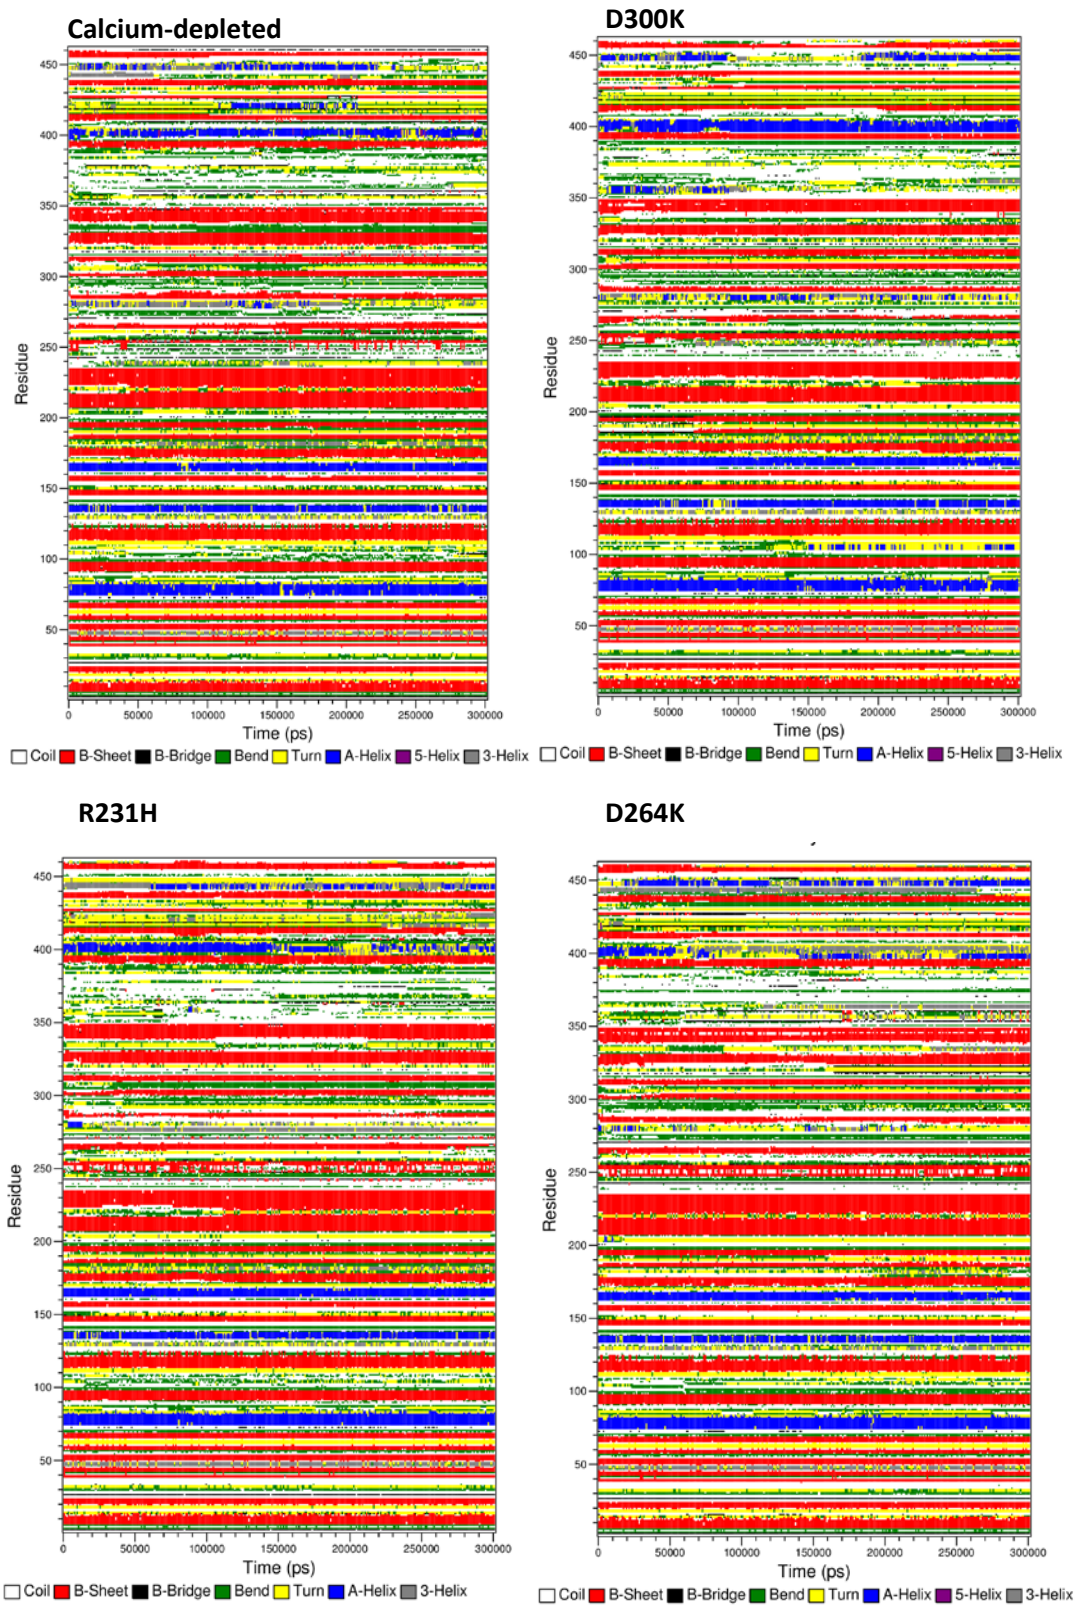

**Supplementary Figure 3**, Evolution of secondary structure elements for the four mutated/modified systems during 300 ns MD simulations.

wildtype

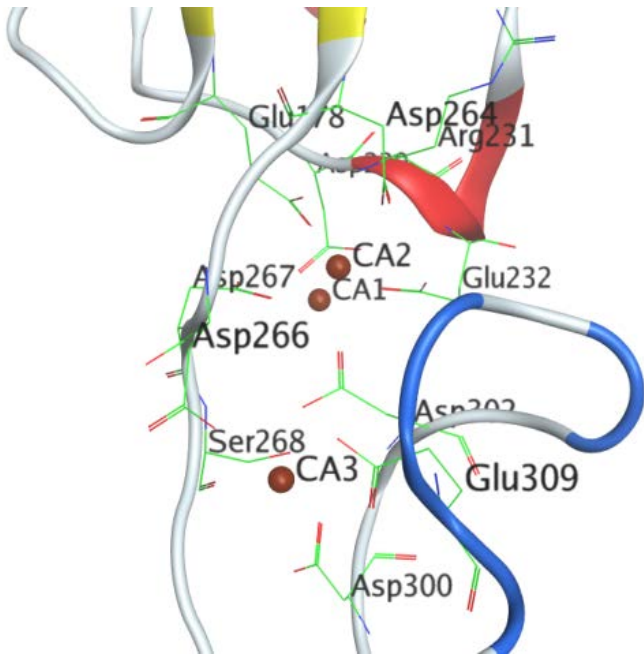

R231H

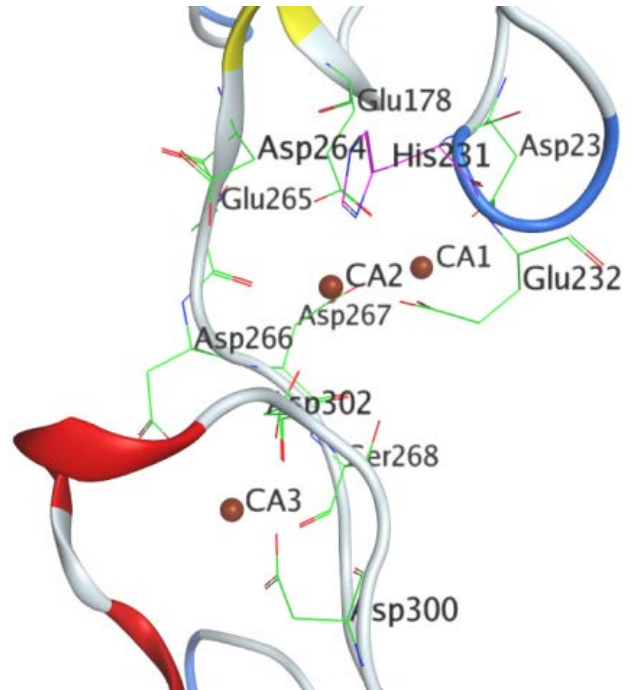

D264K

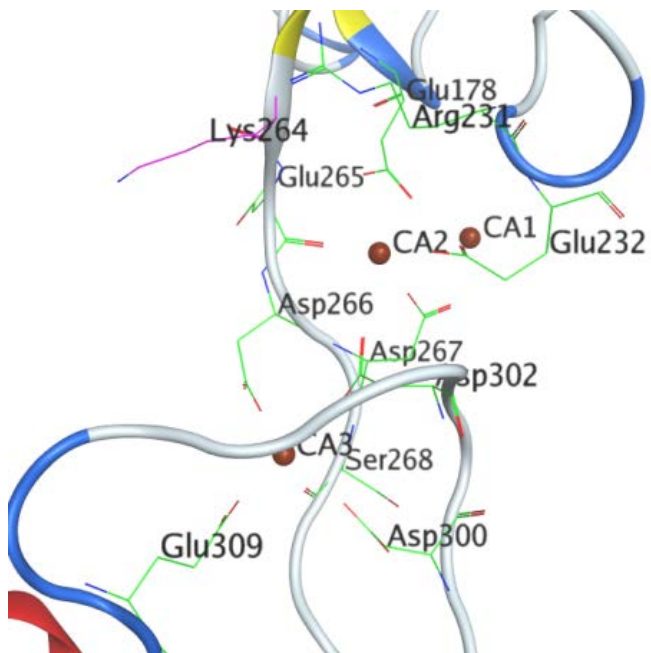

D300K

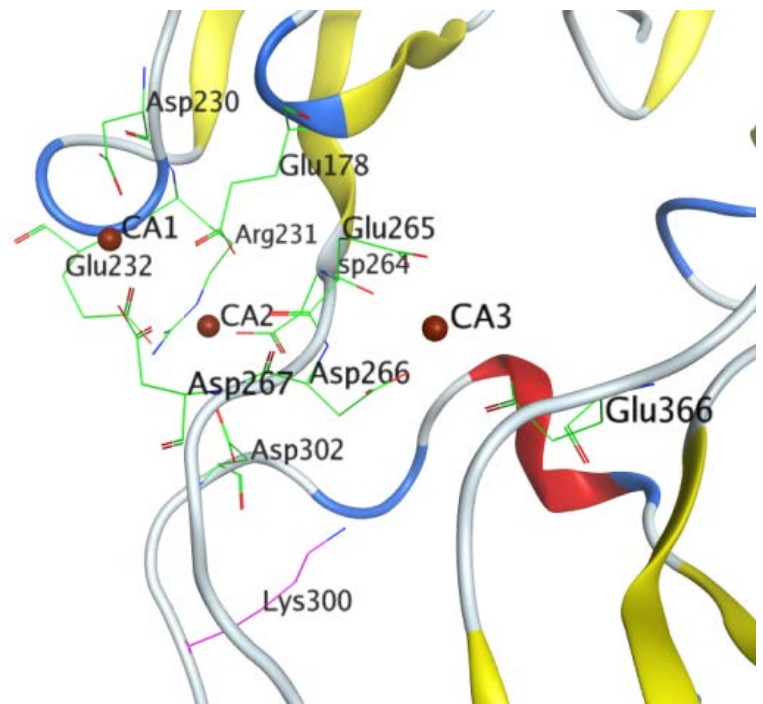

### Calcium-depleted

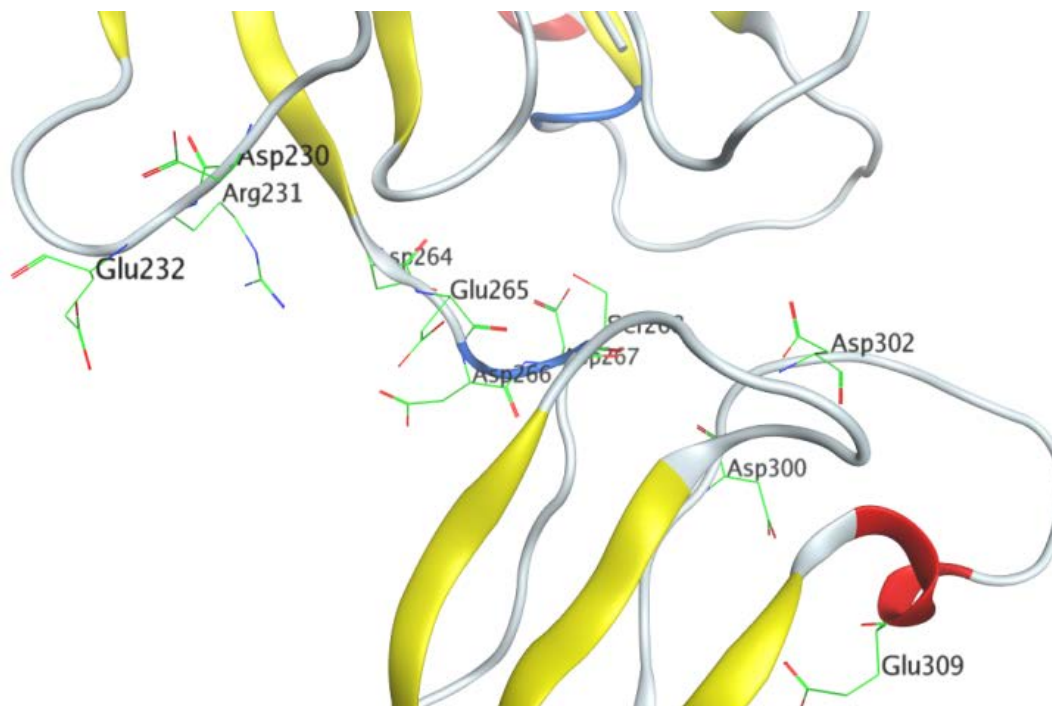

**Supplementary Figure 4**, The most populated structures of the calcium-binding site from cluster analysis for all five systems. The mutated residues in R231H, D264K and D300K mutants are colored in pink.

**Supplementary Table 1.** Distances between the different pharmacophore features.

| Site1 | Site2 | Distance (Å) |
|-------|-------|--------------|
| D21   | D33   | 4.61         |
| D21   | D34   | 8.149        |
| D21   | N39   | 3.371        |
| D21   | N40   | 14.006       |
| D21   | R58   | 4.956        |
| D21   | R60   | 8.731        |
| D33   | D34   | 4.037        |
| D33   | N39   | 7.847        |
| D33   | N40   | 17.705       |
| D33   | R58   | 4.767        |
| D33   | R60   | 12.502       |
| D34   | N39   | 11.395       |
| D34   | N40   | 19.419       |
| D34   | R58   | 5.673        |
| D34   | R60   | 14.556       |
| N39   | N40   | 12.593       |
| N39   | R58   | 7.316        |
| N39   | R60   | 7.242        |
| N40   | R58   | 14.412       |
| N40   | R60   | 6.268        |
| R58   | R60   | 9.079        |



**Supplementary Table 2.** Angles between the different pharmacophore features.

| Site1 | Site2 | Site3 | Angle (°) |
|-------|-------|-------|-----------|
| D33   | D21   | D34   | 18.2      |
| D33   | D21   | N39   | 158.7     |
| D33   | D21   | N40   | 138       |
| D33   | D21   | R58   | 59.6      |
| D33   | D21   | R60   | 136.9     |
| D34   | D21   | N39   | 161.4     |
| D34   | D21   | N40   | 120.1     |
| D34   | D21   | R58   | 43.3      |
| D34   | D21   | R60   | 119.1     |
| N39   | D21   | N40   | 58.8      |
| N39   | D21   | R58   | 121.8     |
| N39   | D21   | R60   | 53.3      |
| N40   | D21   | R58   | 84.6      |
| N40   | D21   | R60   | 17.6      |
| R58   | D21   | R60   | 77.8      |
| D21   | D33   | D34   | 140.8     |
| D21   | D33   | N39   | 9         |
| D21   | D33   | N40   | 31.9      |
| D21   | D33   | R58   | 63.8      |
| D21   | D33   | R60   | 28.5      |
| D34   | D33   | N39   | 145.1     |
| D34   | D33   | N40   | 109.3     |
| D34   | D33   | R58   | 79.8      |
| D34   | D33   | R60   | 112.9     |
| N39   | D33   | N40   | 38.8      |
| N39   | D33   | R58   | 65.7      |
| N39   | D33   | R60   | 32.5      |
| N40   | D33   | R58   | 40.4      |
| N40   | D33   | R60   | 13.5      |
| R58   | D33   | R60   | 35.9      |
| D21   | D34   | D33   | 20.9      |
| D21   | D34   | N39   | 5.4       |
| D21   | D34   | N40   | 38.6      |
| D21   | D34   | R58   | 36.8      |
| D21   | D34   | R60   | 31.6      |
| D33   | D34   | N39   | 23.2      |
| D33   | D34   | N40   | 59.3      |
| D33   | D34   | R58   | 55.8      |
| D33   | D34   | R60   | 52.3      |
| N39   | D34   | N40   | 38.1      |
| N39   | D34   | R58   | 32.9      |
| N39   | D34   | R60   | 29.3      |
| N40   | D34   | R58   | 23.8      |
| N40   | D34   | R60   | 13.5      |

|     |     |     |       |
|-----|-----|-----|-------|
| R58 | D34 | R60 | 11.9  |
| D21 | N39 | D33 | 12.3  |
| D21 | N39 | D34 | 13.2  |
| D21 | N39 | N40 | 108   |
| D21 | N39 | R58 | 35.2  |
| D21 | N39 | R60 | 104.7 |
| D33 | N39 | D34 | 11.7  |
| D33 | N39 | N40 | 118.2 |
| D33 | N39 | R58 | 36.4  |
| D33 | N39 | R60 | 111.8 |
| D34 | N39 | N40 | 108   |
| D34 | N39 | R58 | 24.9  |
| D34 | N39 | R60 | 100.3 |
| N40 | N39 | R58 | 88.6  |
| N40 | N39 | R60 | 19.7  |
| R58 | N39 | R60 | 77.2  |
| D21 | N40 | D33 | 10    |
| D21 | N40 | D34 | 21.3  |
| D21 | N40 | N39 | 13.2  |
| D21 | N40 | R58 | 20    |
| D21 | N40 | R60 | 24.9  |
| D33 | N40 | D34 | 11.3  |
| D33 | N40 | N39 | 23    |
| D33 | N40 | R58 | 12.4  |
| D33 | N40 | R60 | 27.7  |
| D34 | N40 | N39 | 33.9  |
| D34 | N40 | R58 | 9.1   |
| D34 | N40 | R60 | 32.8  |
| N39 | N40 | R58 | 30.5  |
| N39 | N40 | R60 | 22.9  |
| R58 | N40 | R60 | 24.4  |
| D21 | R58 | D33 | 56.6  |
| D21 | R58 | D34 | 99.9  |
| D21 | R58 | N39 | 23.1  |
| D21 | R58 | N40 | 75.4  |
| D21 | R58 | R60 | 70    |
| D33 | R58 | D34 | 44.5  |
| D33 | R58 | N39 | 77.9  |
| D33 | R58 | N40 | 127.2 |
| D33 | R58 | R60 | 126.2 |
| D34 | R58 | N39 | 122.1 |
| D34 | R58 | N40 | 147   |
| D34 | R58 | R60 | 160.7 |
| N39 | R58 | N40 | 60.9  |
| N39 | R58 | R60 | 51.1  |
| N40 | R58 | R60 | 16.6  |

|     |     |     |       |
|-----|-----|-----|-------|
| D21 | R60 | D33 | 14.6  |
| D21 | R60 | D34 | 29.3  |
| D21 | R60 | N39 | 21.9  |
| D21 | R60 | N40 | 137.5 |
| D21 | R60 | R58 | 32.2  |
| D33 | R60 | D34 | 14.8  |
| D33 | R60 | N39 | 35.6  |
| D33 | R60 | N40 | 138.8 |
| D33 | R60 | R58 | 17.9  |
| D34 | R60 | N39 | 50.4  |
| D34 | R60 | N40 | 133.6 |
| D34 | R60 | R58 | 7.4   |
| N39 | R60 | N40 | 137.4 |
| N39 | R60 | R58 | 51.8  |
| N40 | R60 | R58 | 139.1 |
